# Supplementary material
Source: PubMed Central journal article supplement (PMC11029298)

**Online supplemental material.**

**Figure S1. Flow cytometry analysis of human HER2 expression.**

The D5-HER2 cell line was generated by transfecting D5 melanoma cells with the full length human HER2 gene. HER2 expression on tumor cells from the D5, D5-HER2 and SKOV-3 cell lines were evaluated by flow cytometry. PE conjugated anti-human HER2 antibody or control antibody was added to the HER2 positive and negative cell lines. Peaks a, d and e indicate anti-HER2 antibody staining of D5, D5-HER2 and SKOV-3 cells. Peaks b and c indicate control staining of D5-HER2 cell and SKOV-3 cells, respectively.

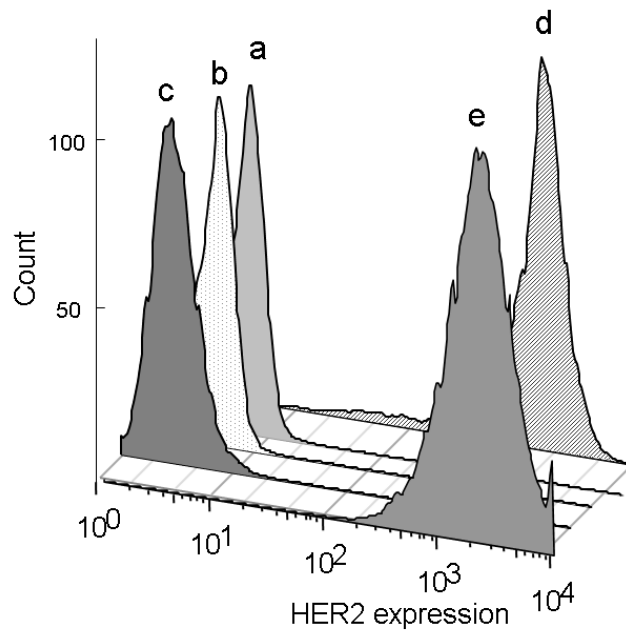

Supplement: 262_2011_1090_MOESM1_ESM.pdf [file 262_2011_1090_MOESM1_ESM.pdf]
